# Supplementary material for: Selective CK1α degraders exert antiproliferative activity against a broad range of human cancer cell lines
Source: PubMed Central journal article supplement (PMC10791743; doi:10.1038/s41467-024-44698-1), 2024-01-16
Supplement: 41467_2024_44698_MOESM3_ESM.pdf [file 41467_2024_44698_MOESM3_ESM.pdf]

Title: Supplementary Data 1

Description:

- a. Collected IC<sub>50</sub> values and cell line mutation status
- b. Cell Lines Information

Title: Supplementary Movie 1.

Description: Morph of CK1 $\alpha$  domain rotation when bound to SJ3149 (8G66) vs. lenalidomide (5FQD).
